# Supplementary material for: Synthesis and in Vitro Antifungal Activity against Botrytis cinerea of Geranylated Phenols and Their Phenyl Acetate Derivatives
Source: PubMed Central journal article supplement (PMC4581290; doi:10.3390/ijms160819130), 2015-08-14
Supplement: ijms-16-19130-s001.pdf [file ijms-16-19130-s001.pdf]

# Supplementary Information

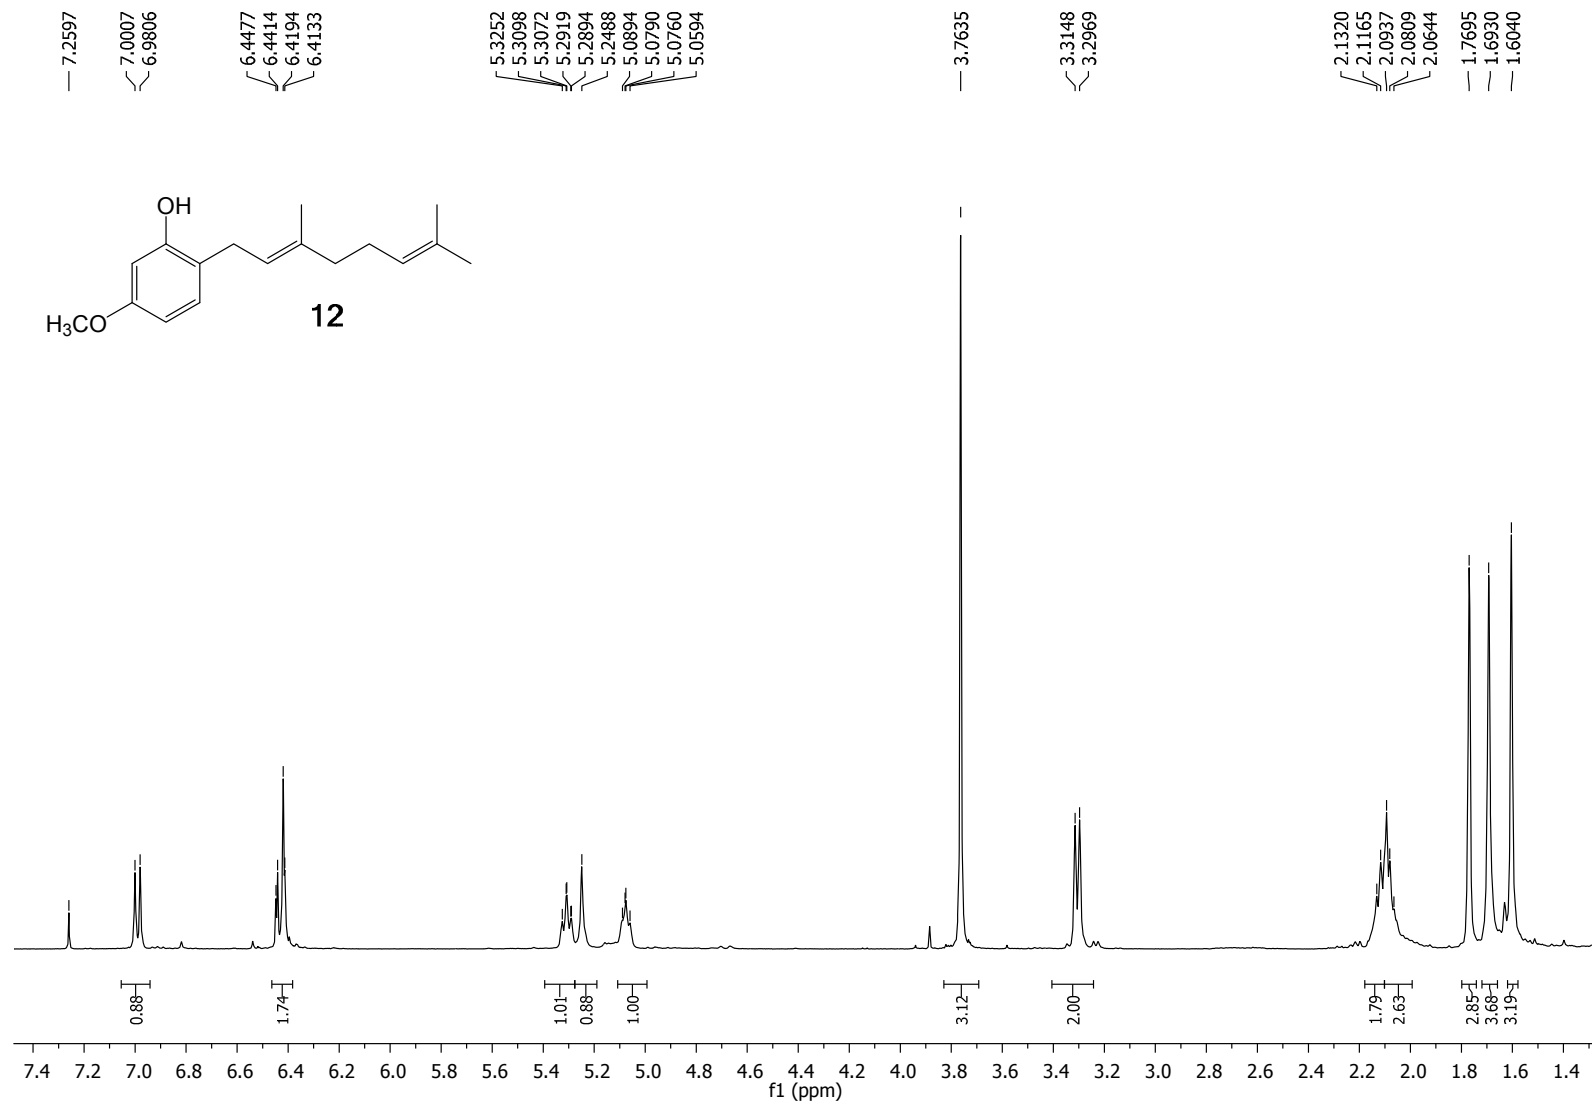

Figure S1. Cont.

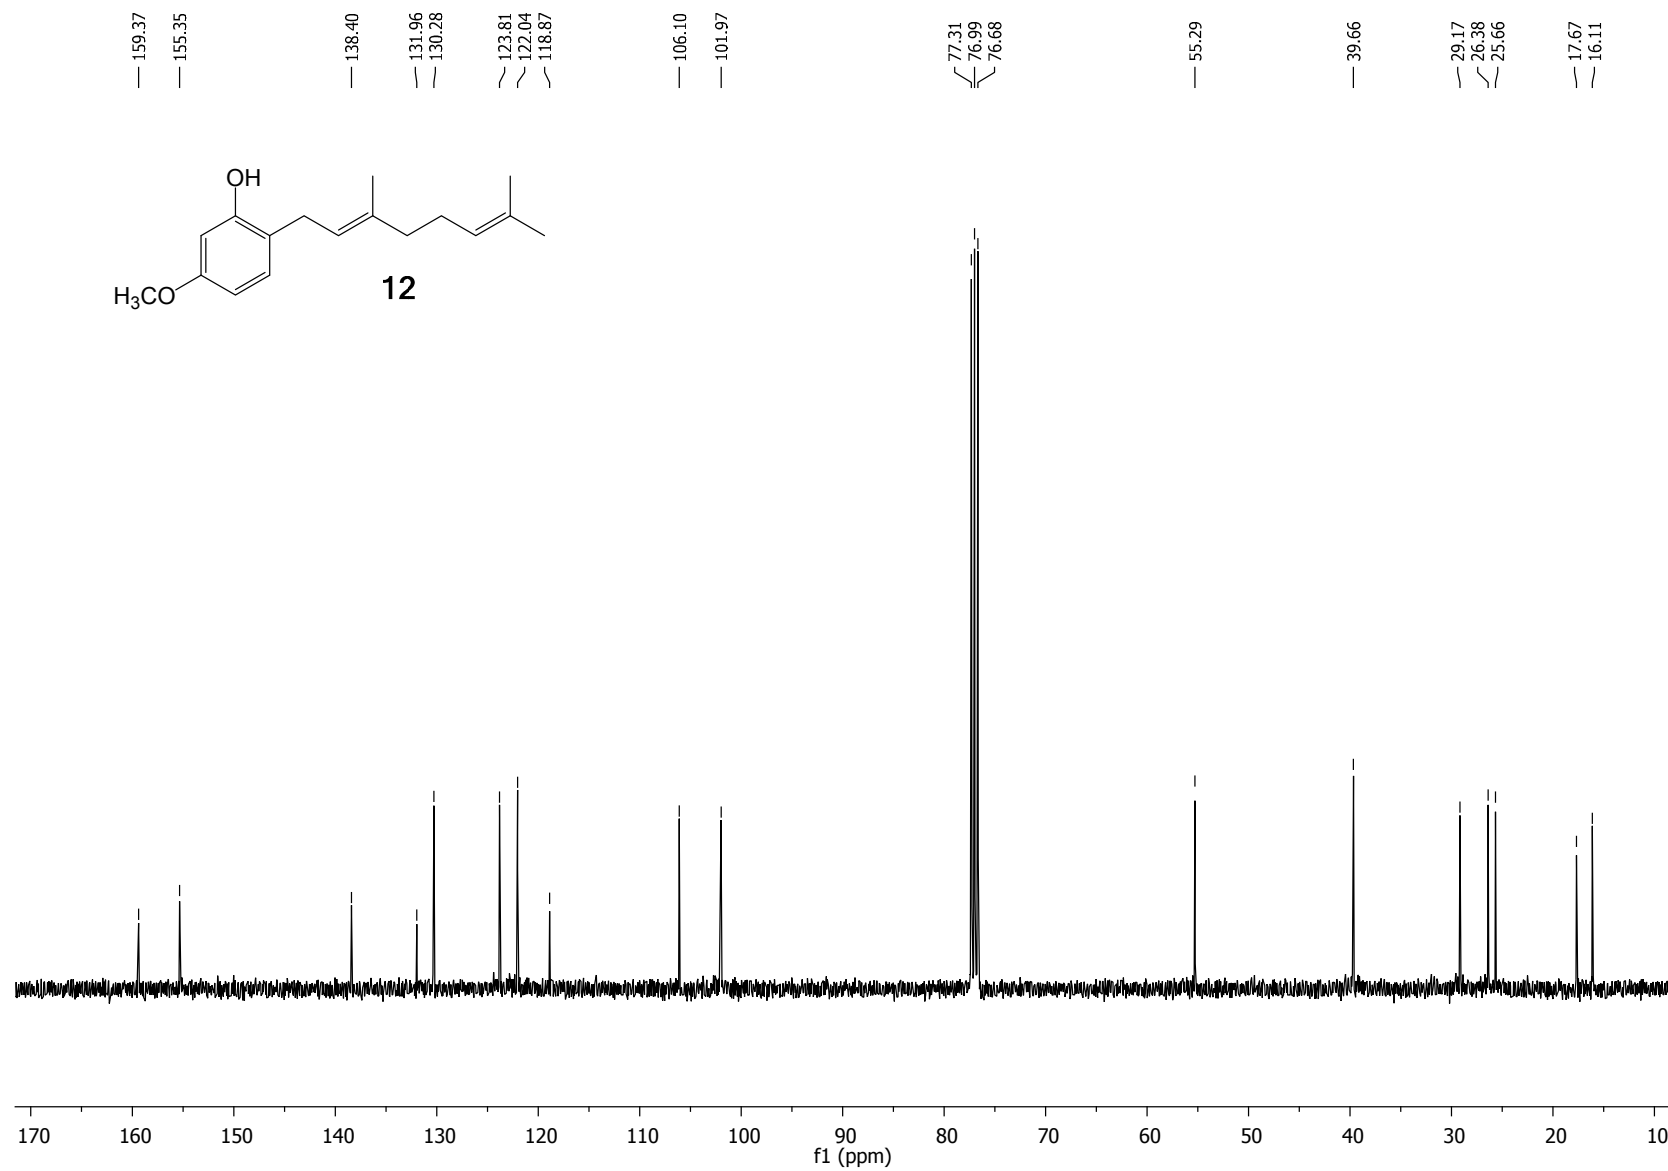

Figure S1. Cont.

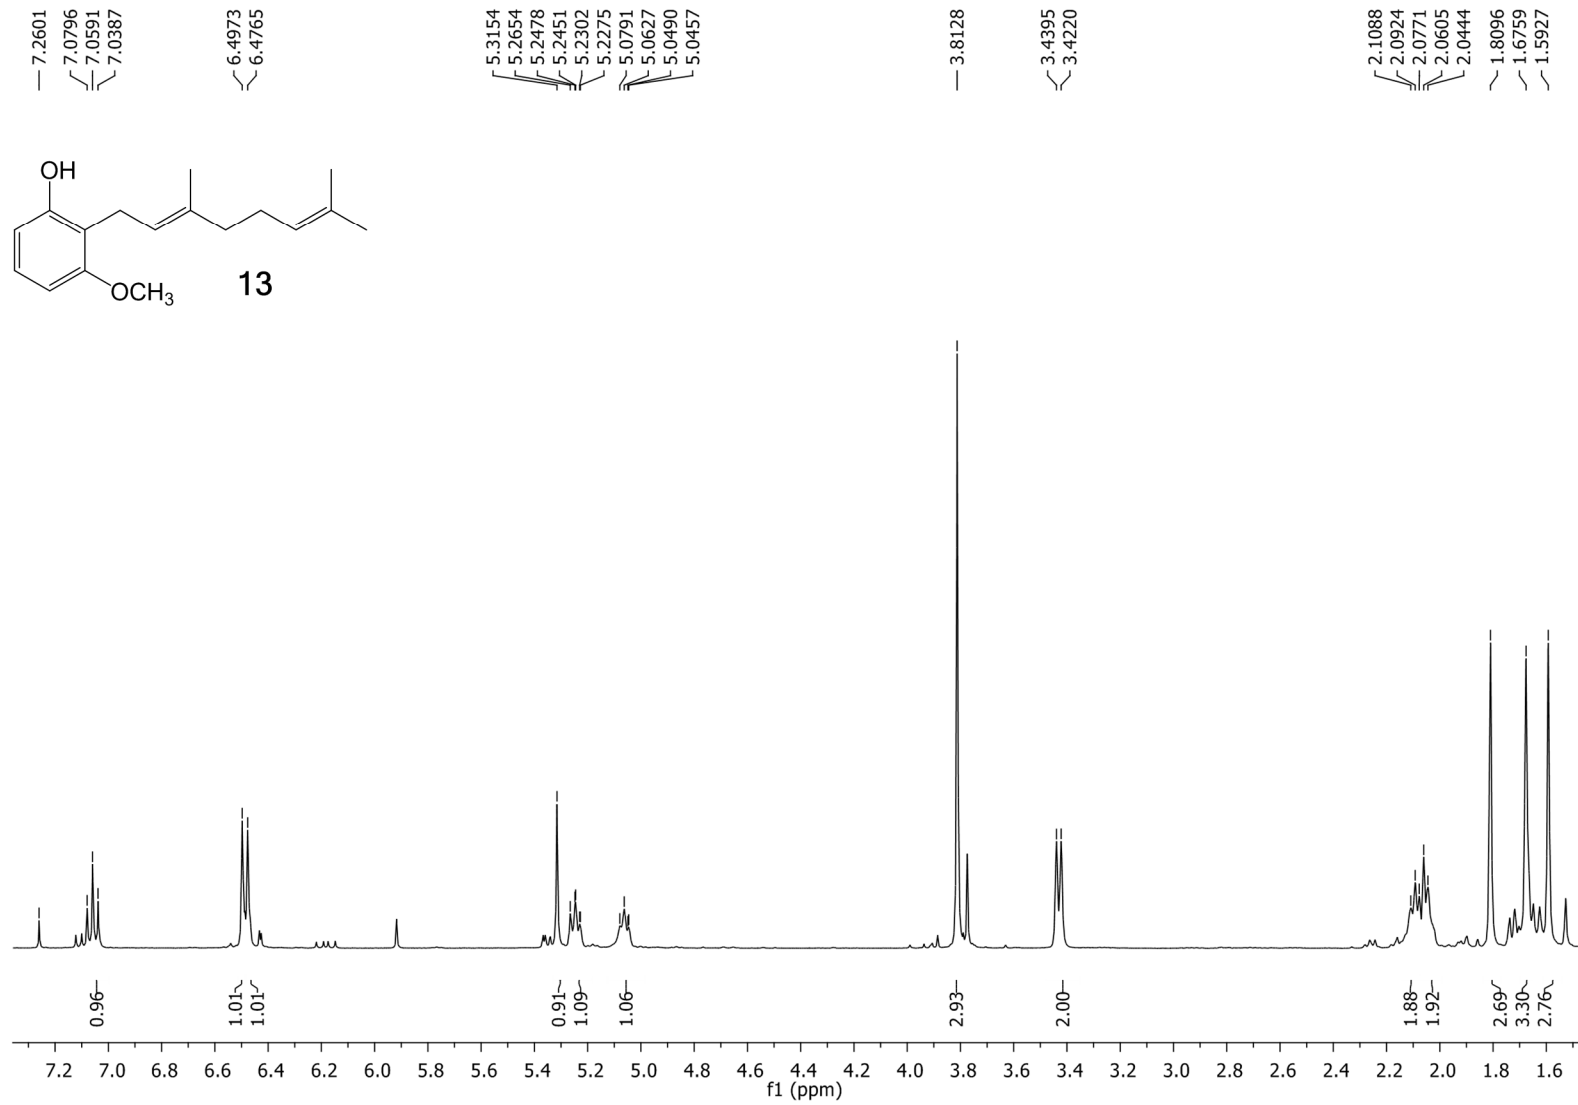

Figure S1. Cont.

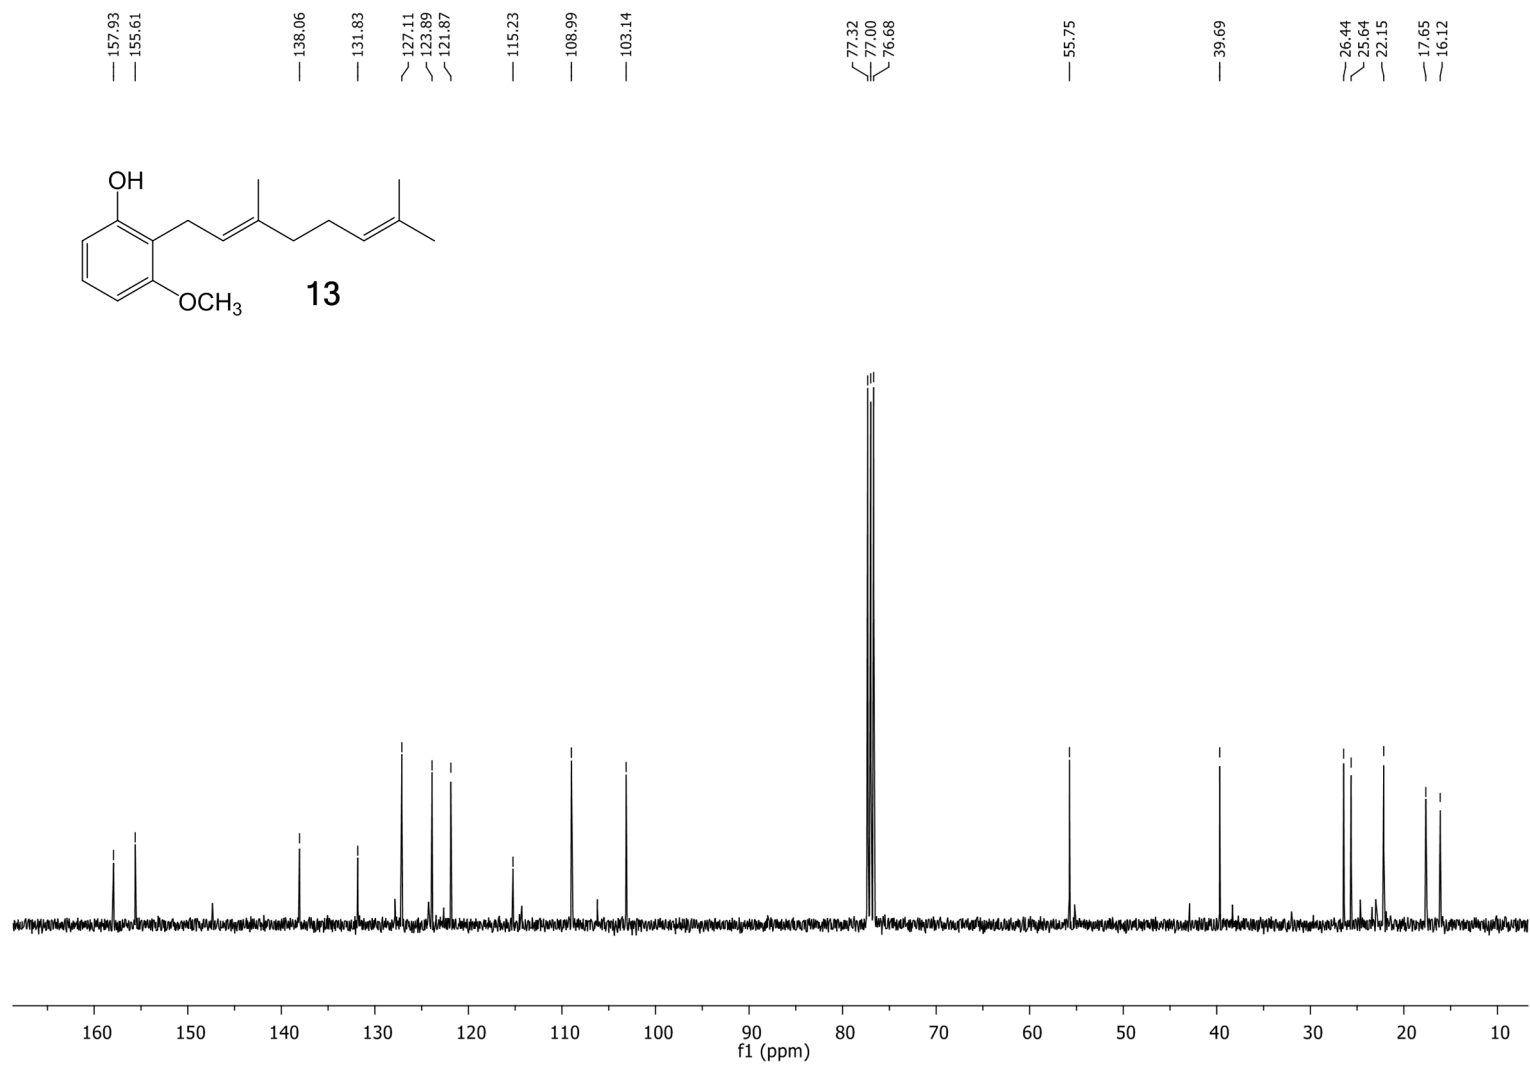

Figure S1. Cont.

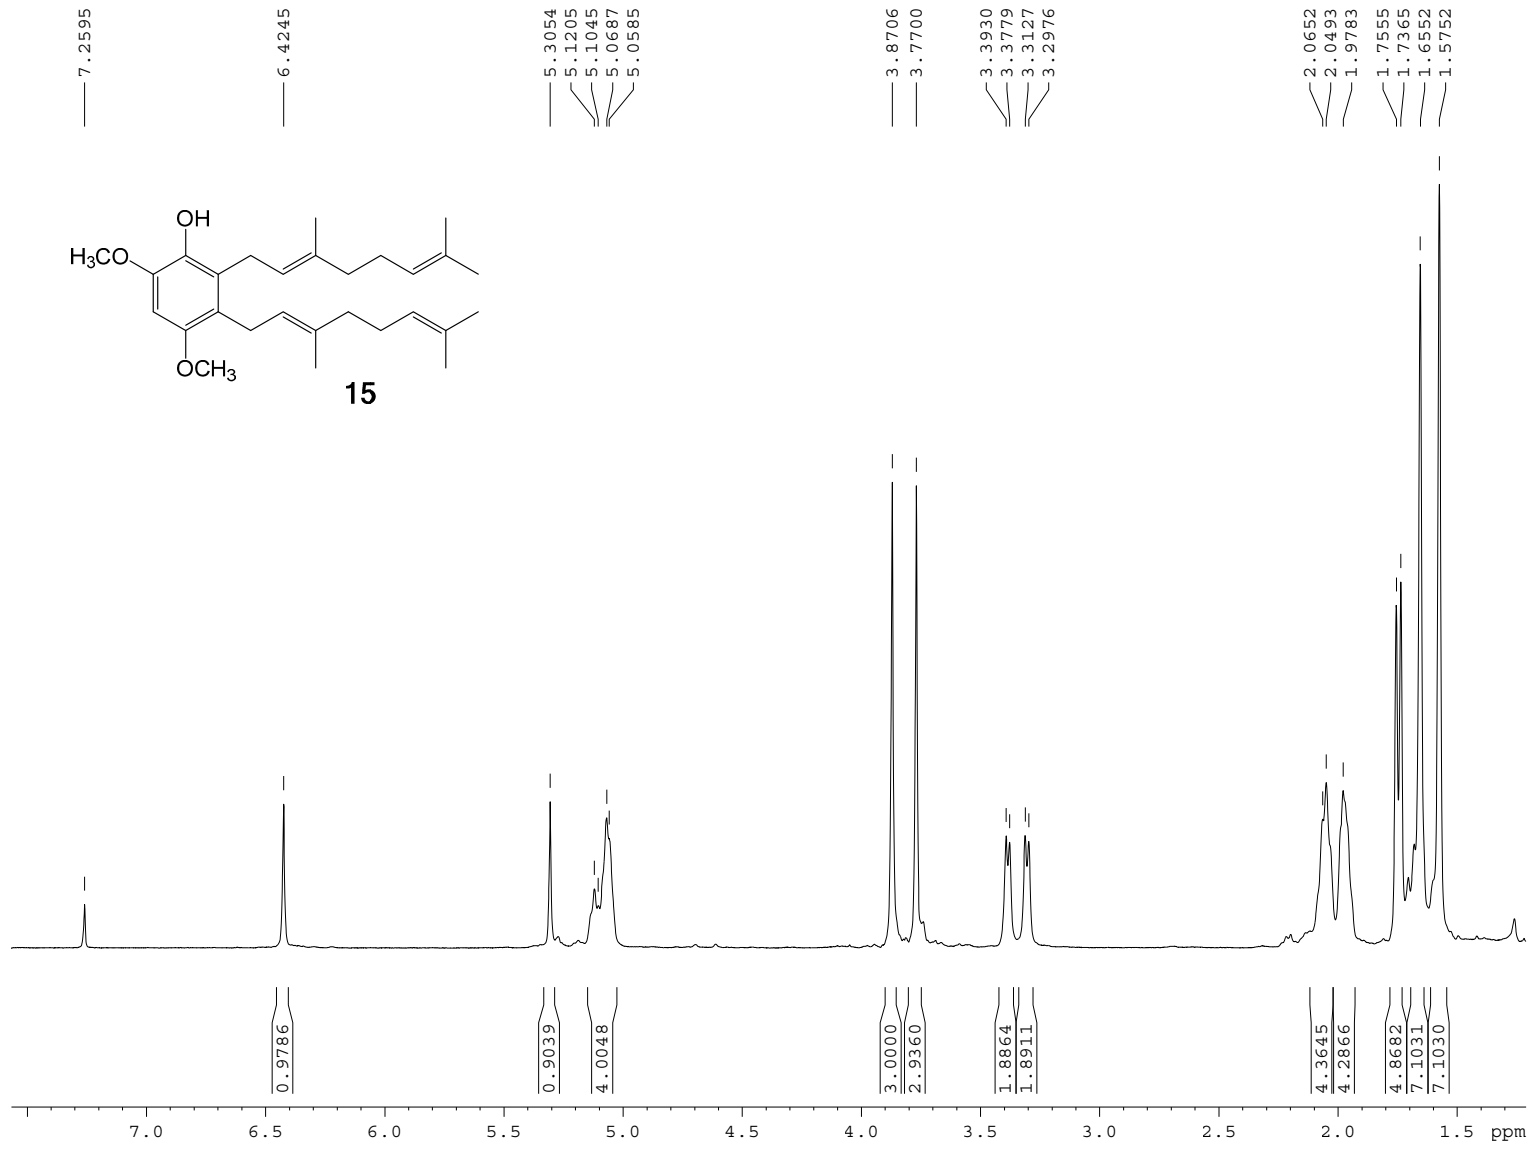

Figure S1. Cont.

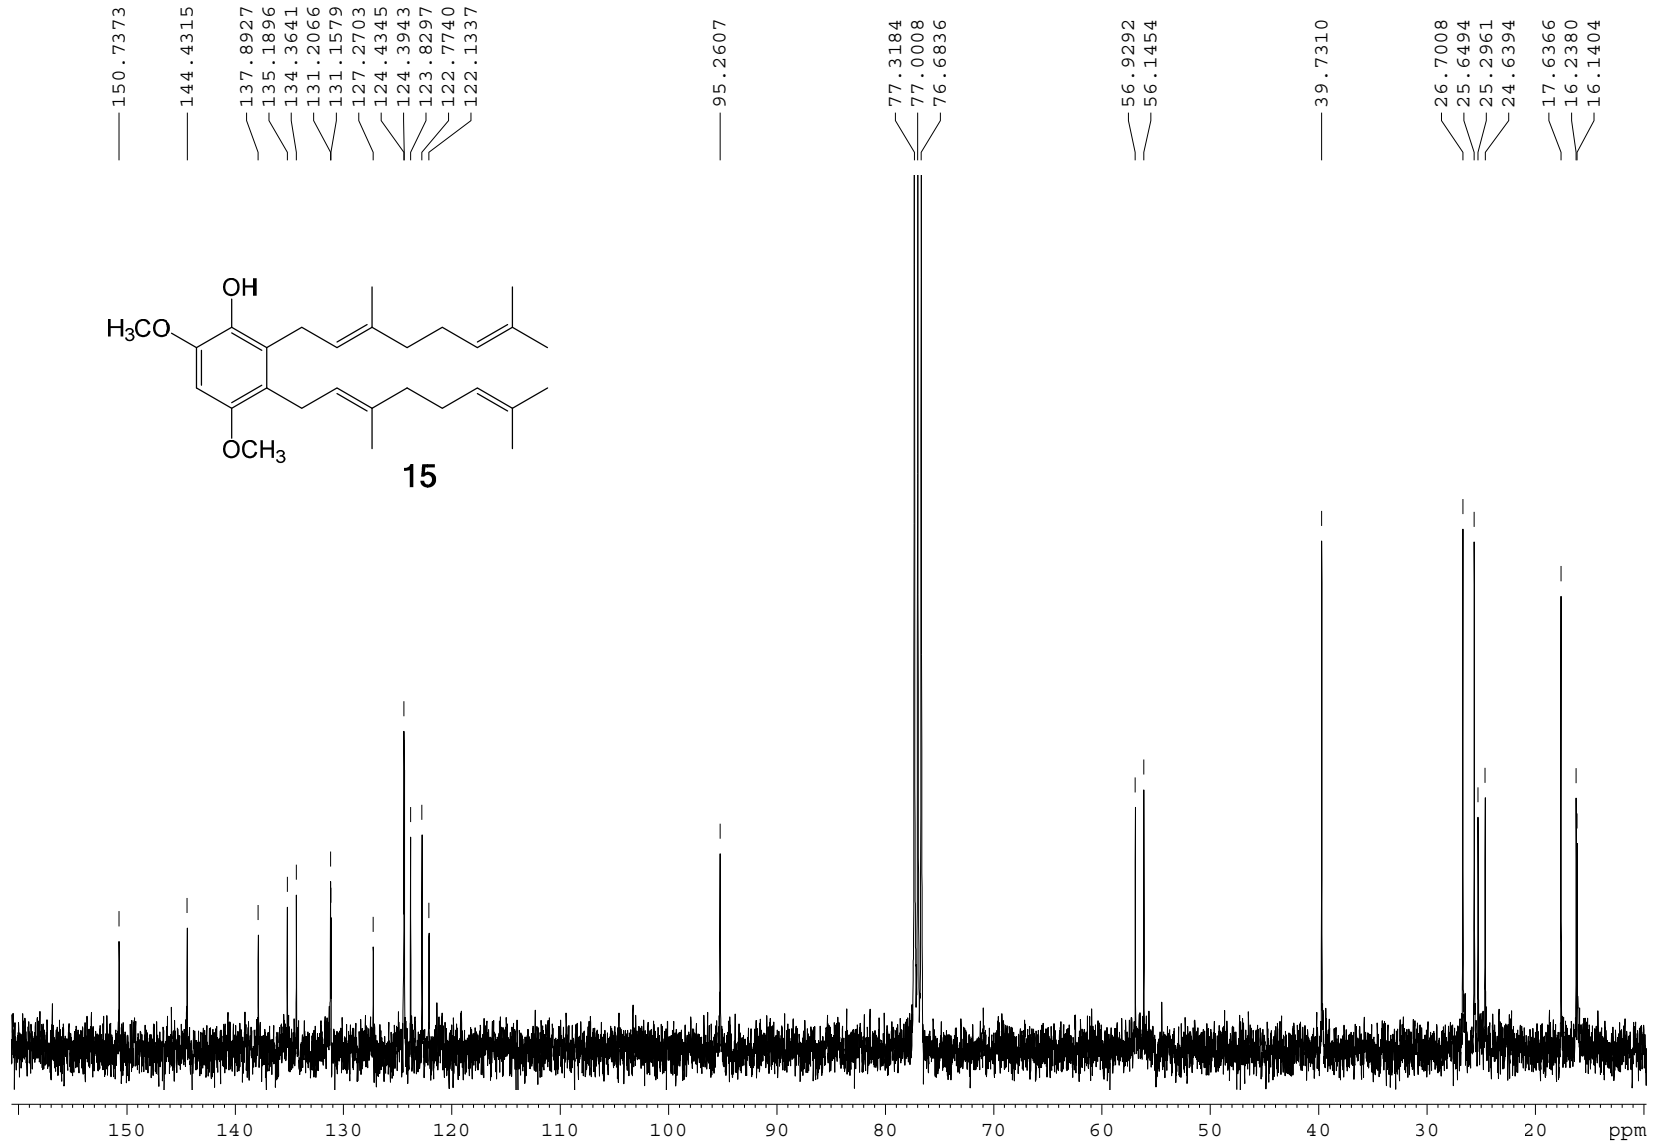

Figure S1. Cont.

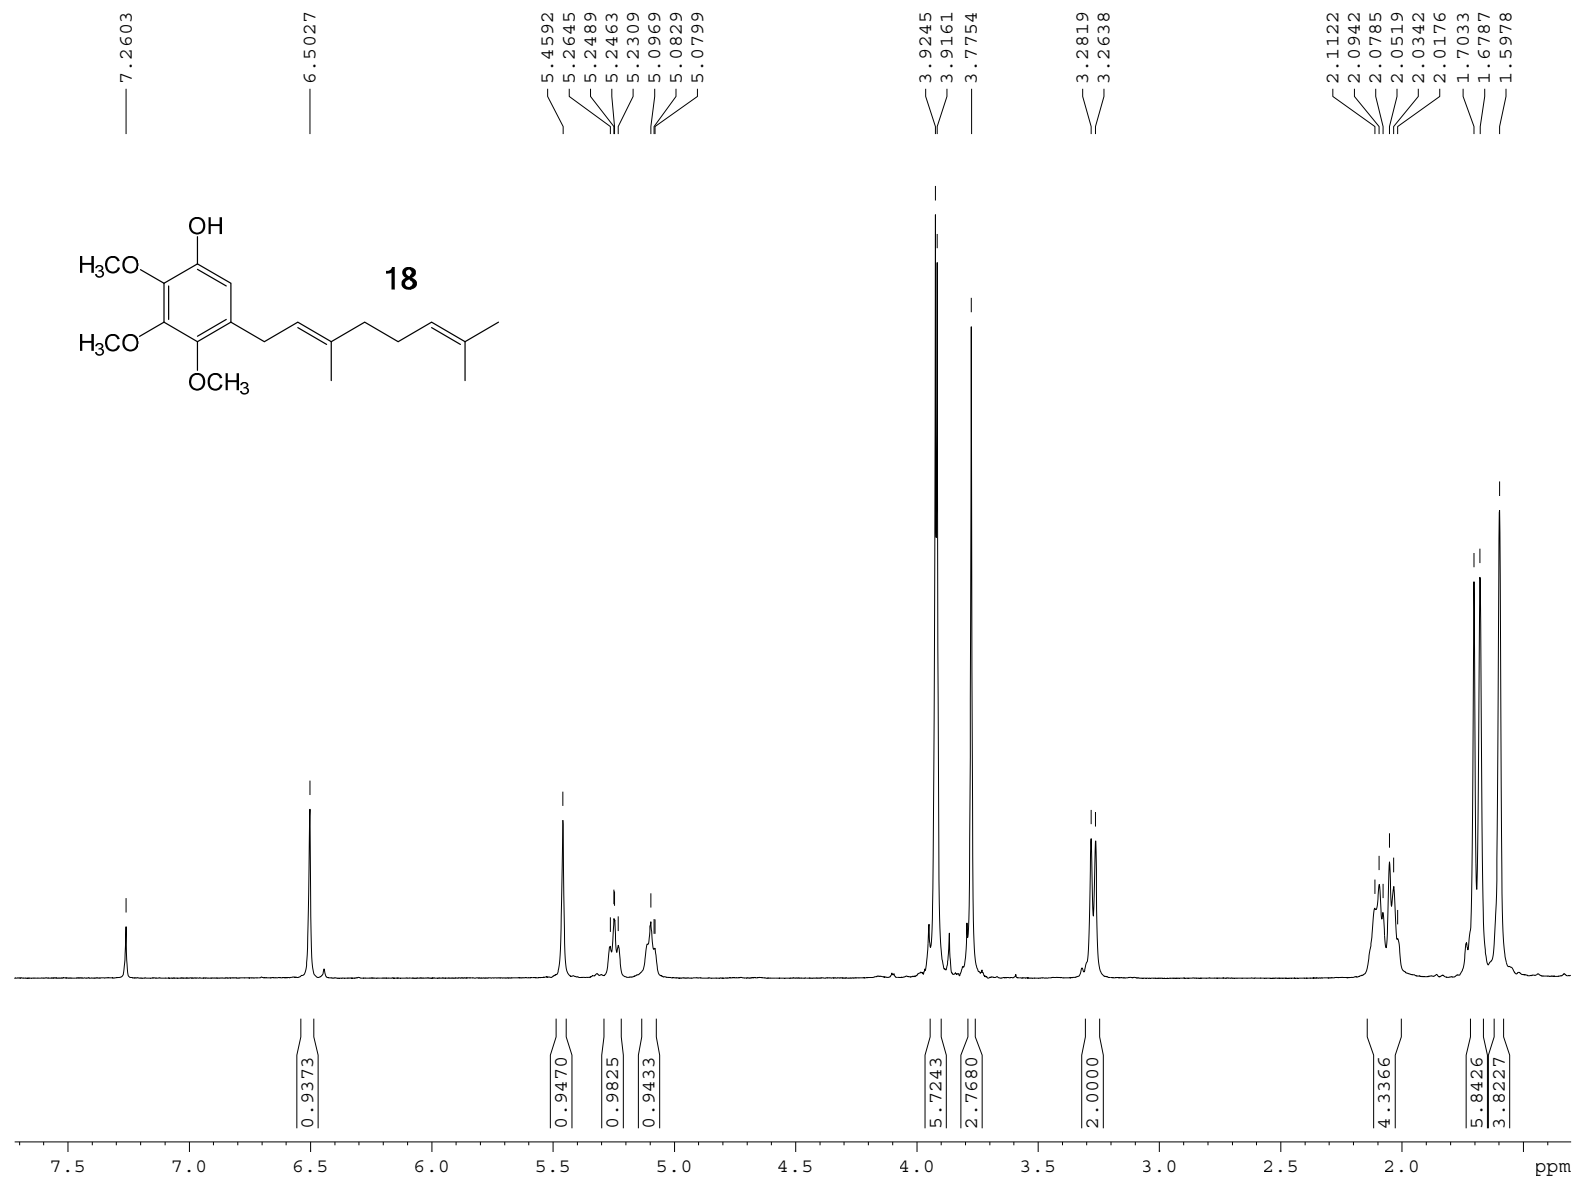

Figure S1. Cont.

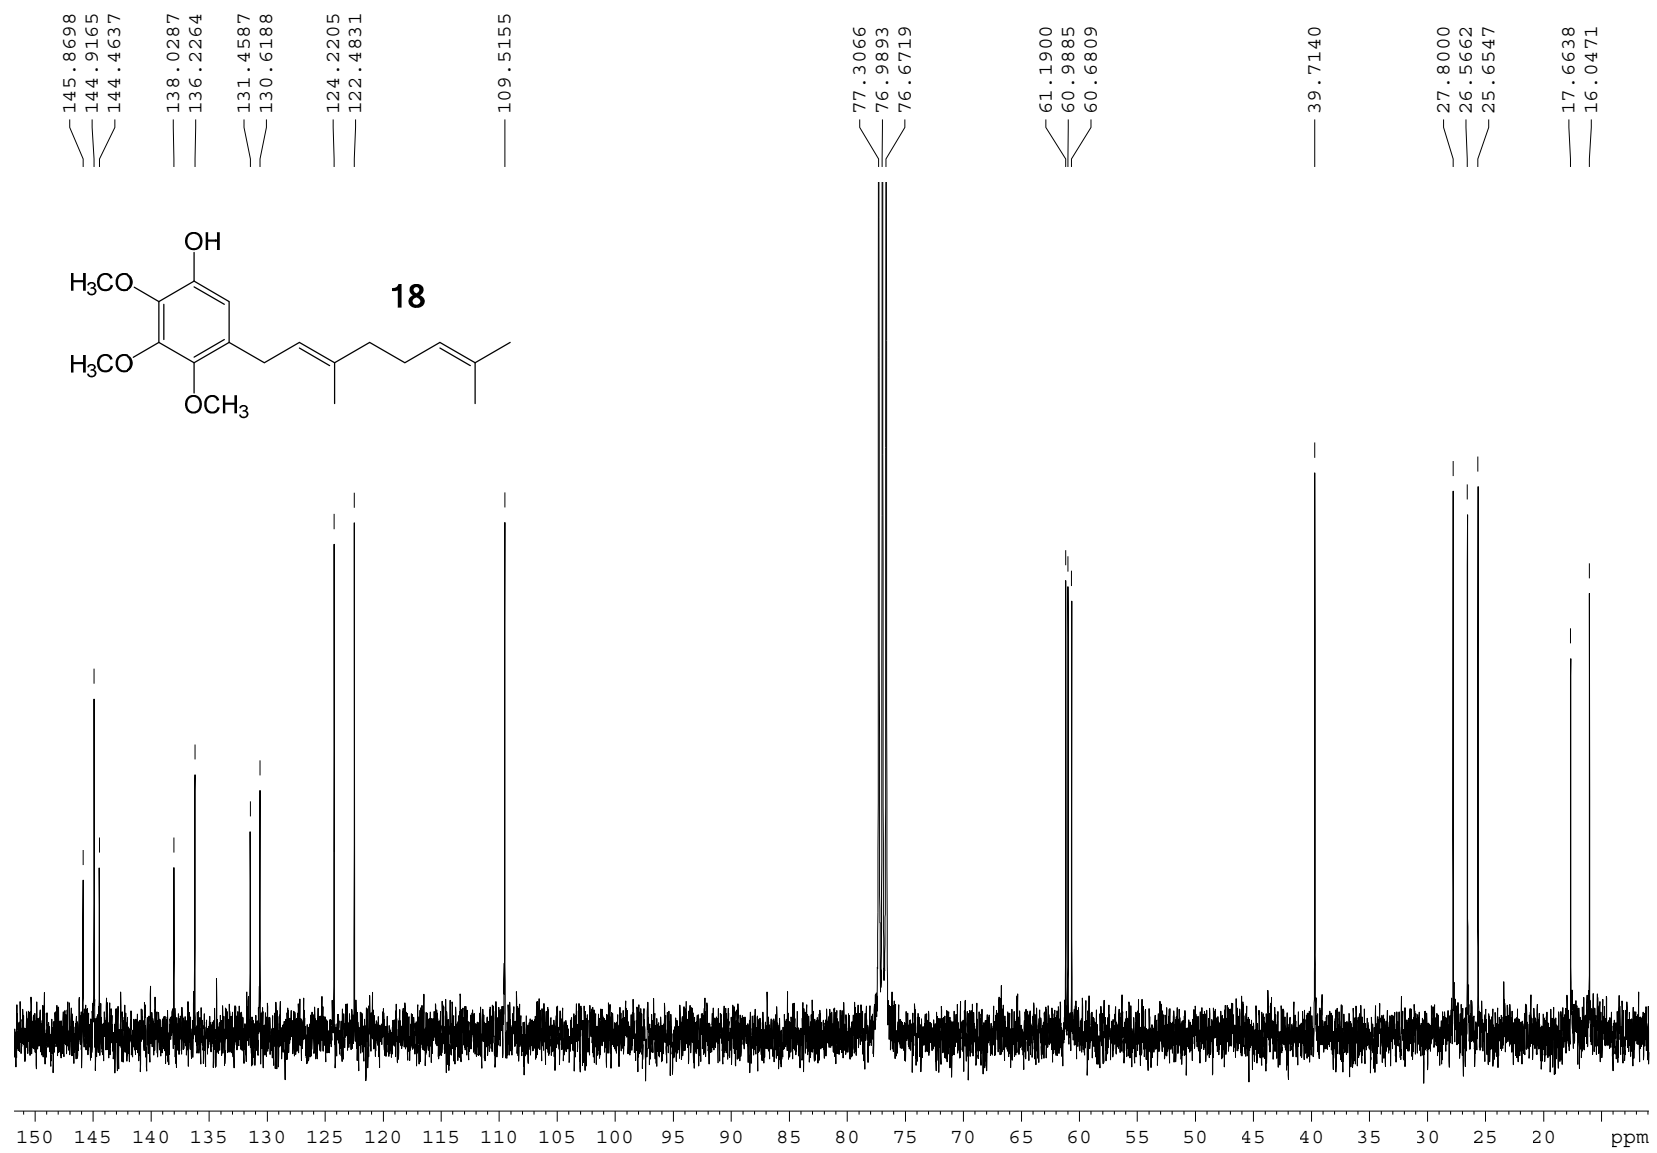

Figure S1. Cont.



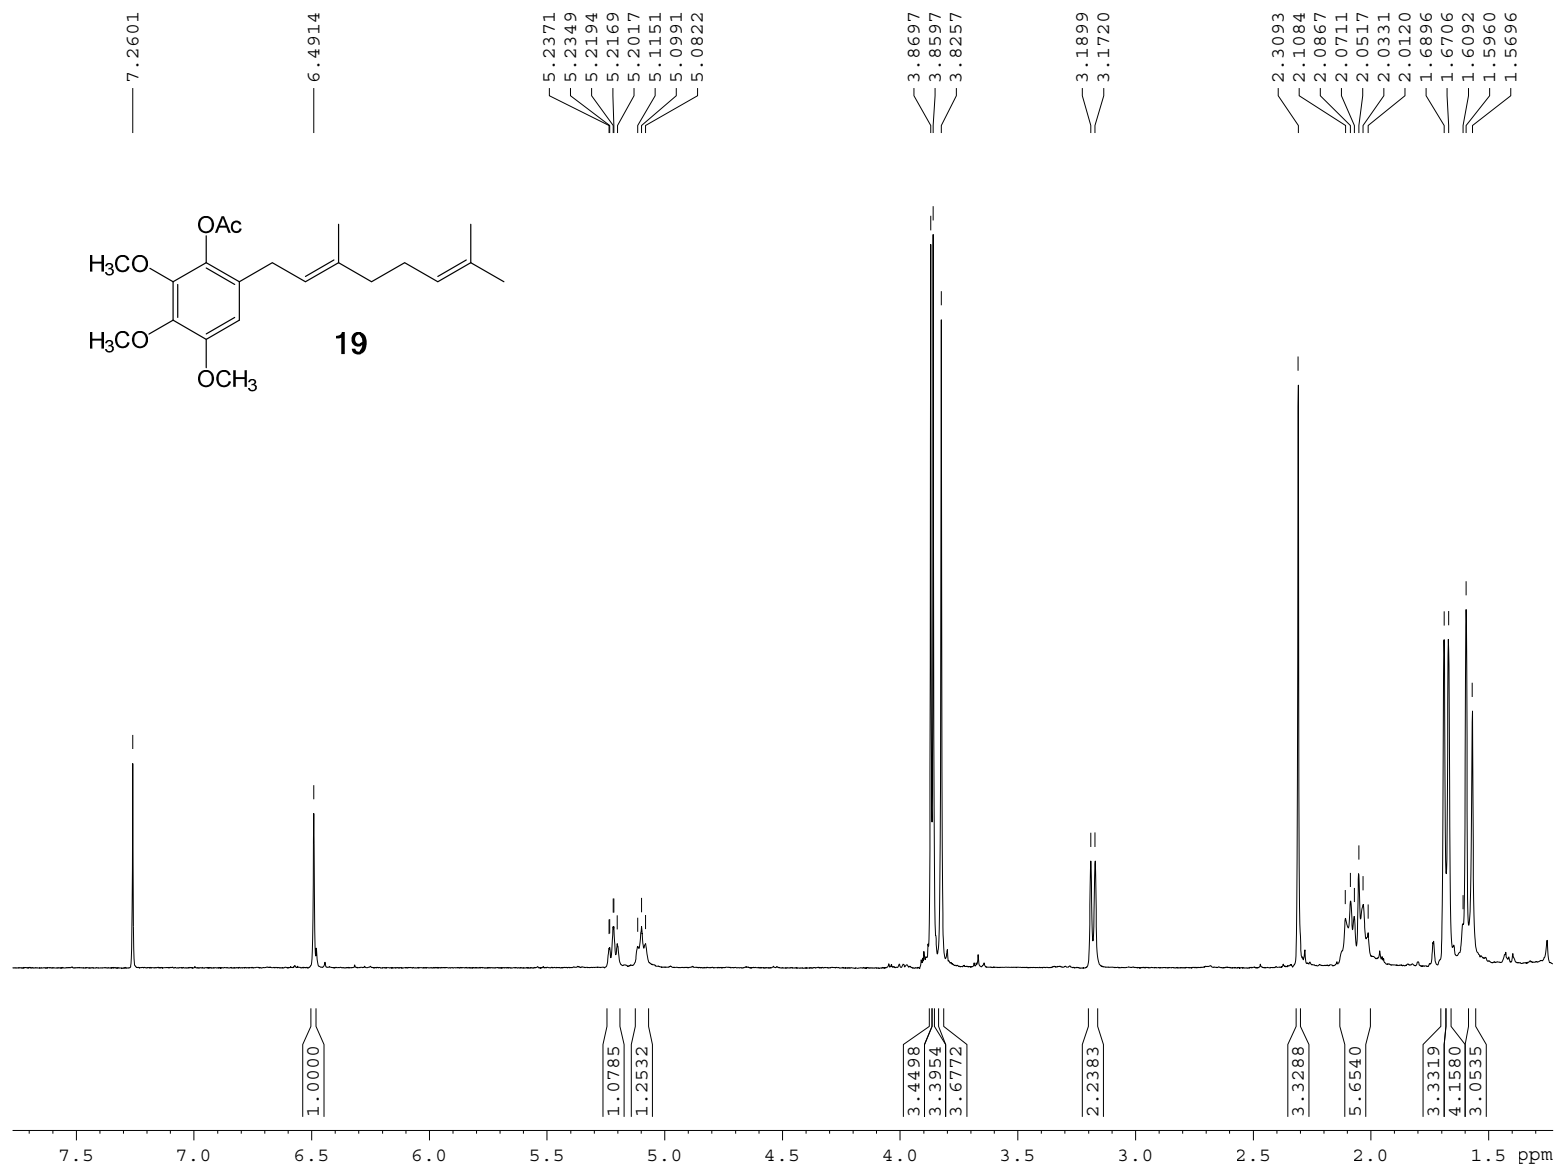

Figure S1. Cont.

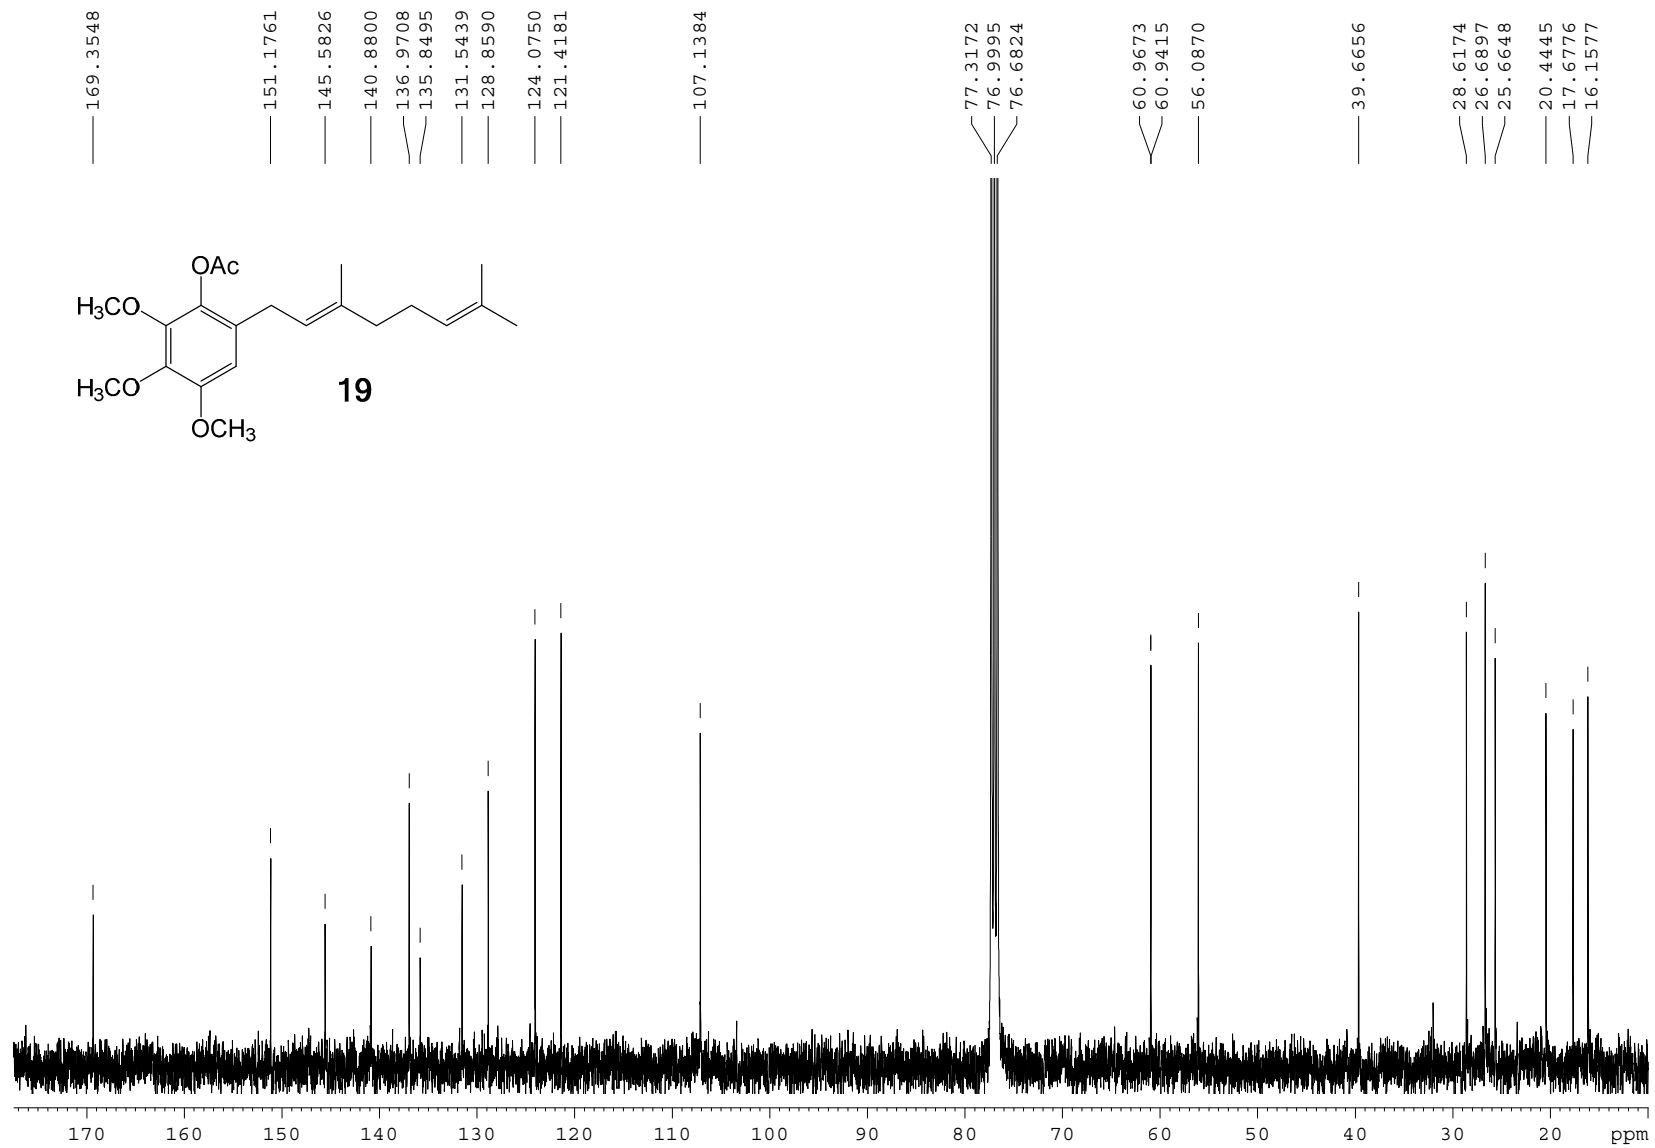

Figure S1. Cont.

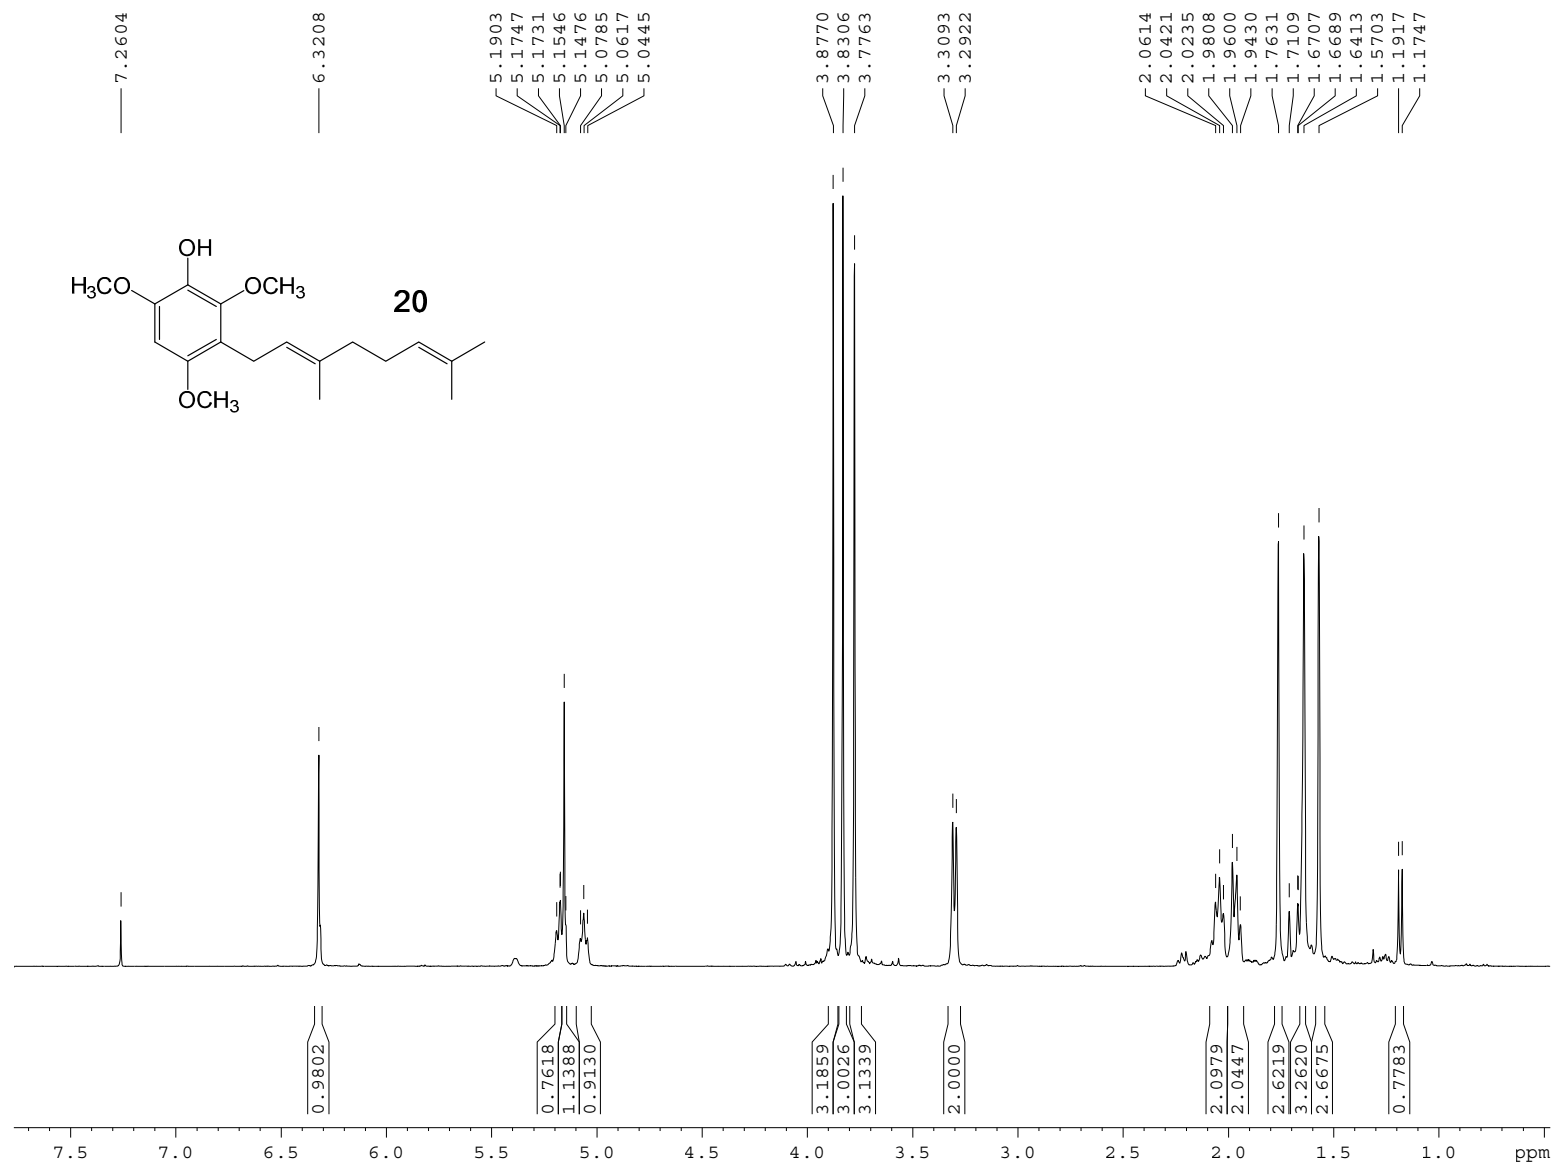

Figure S1. Cont.

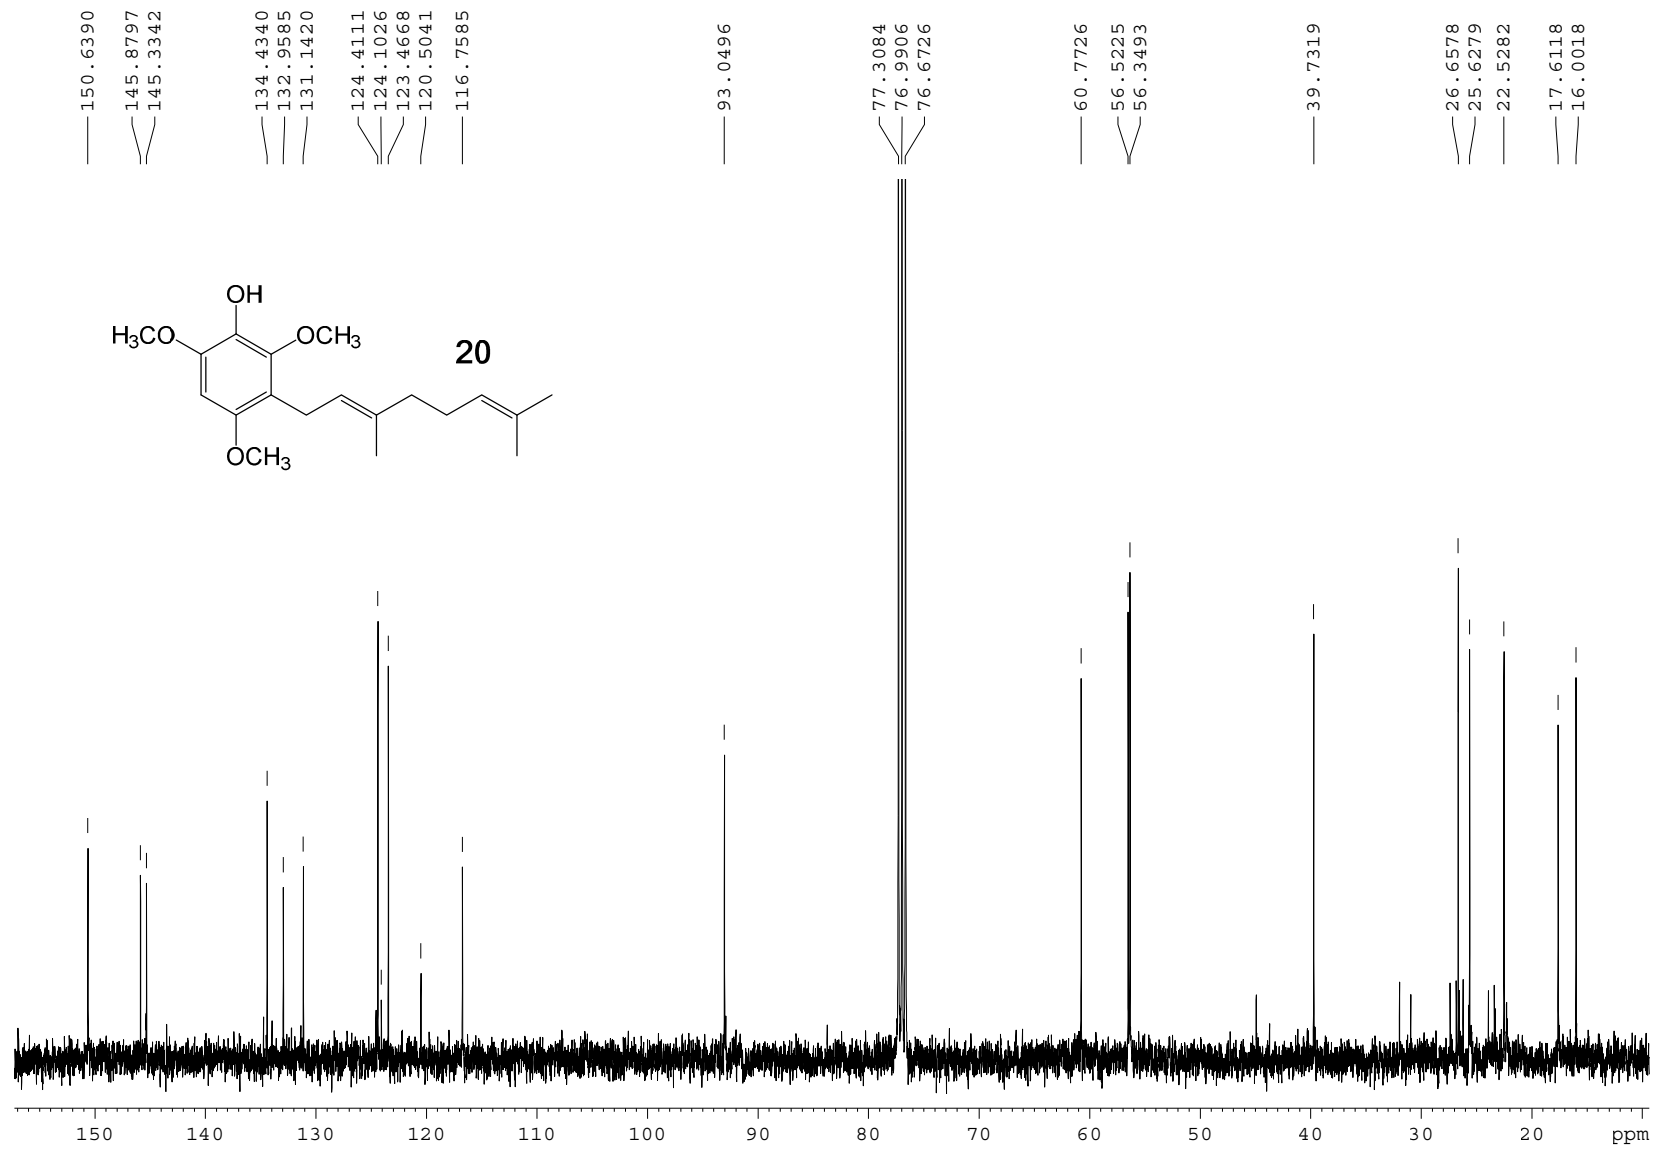

Figure S1. Cont.

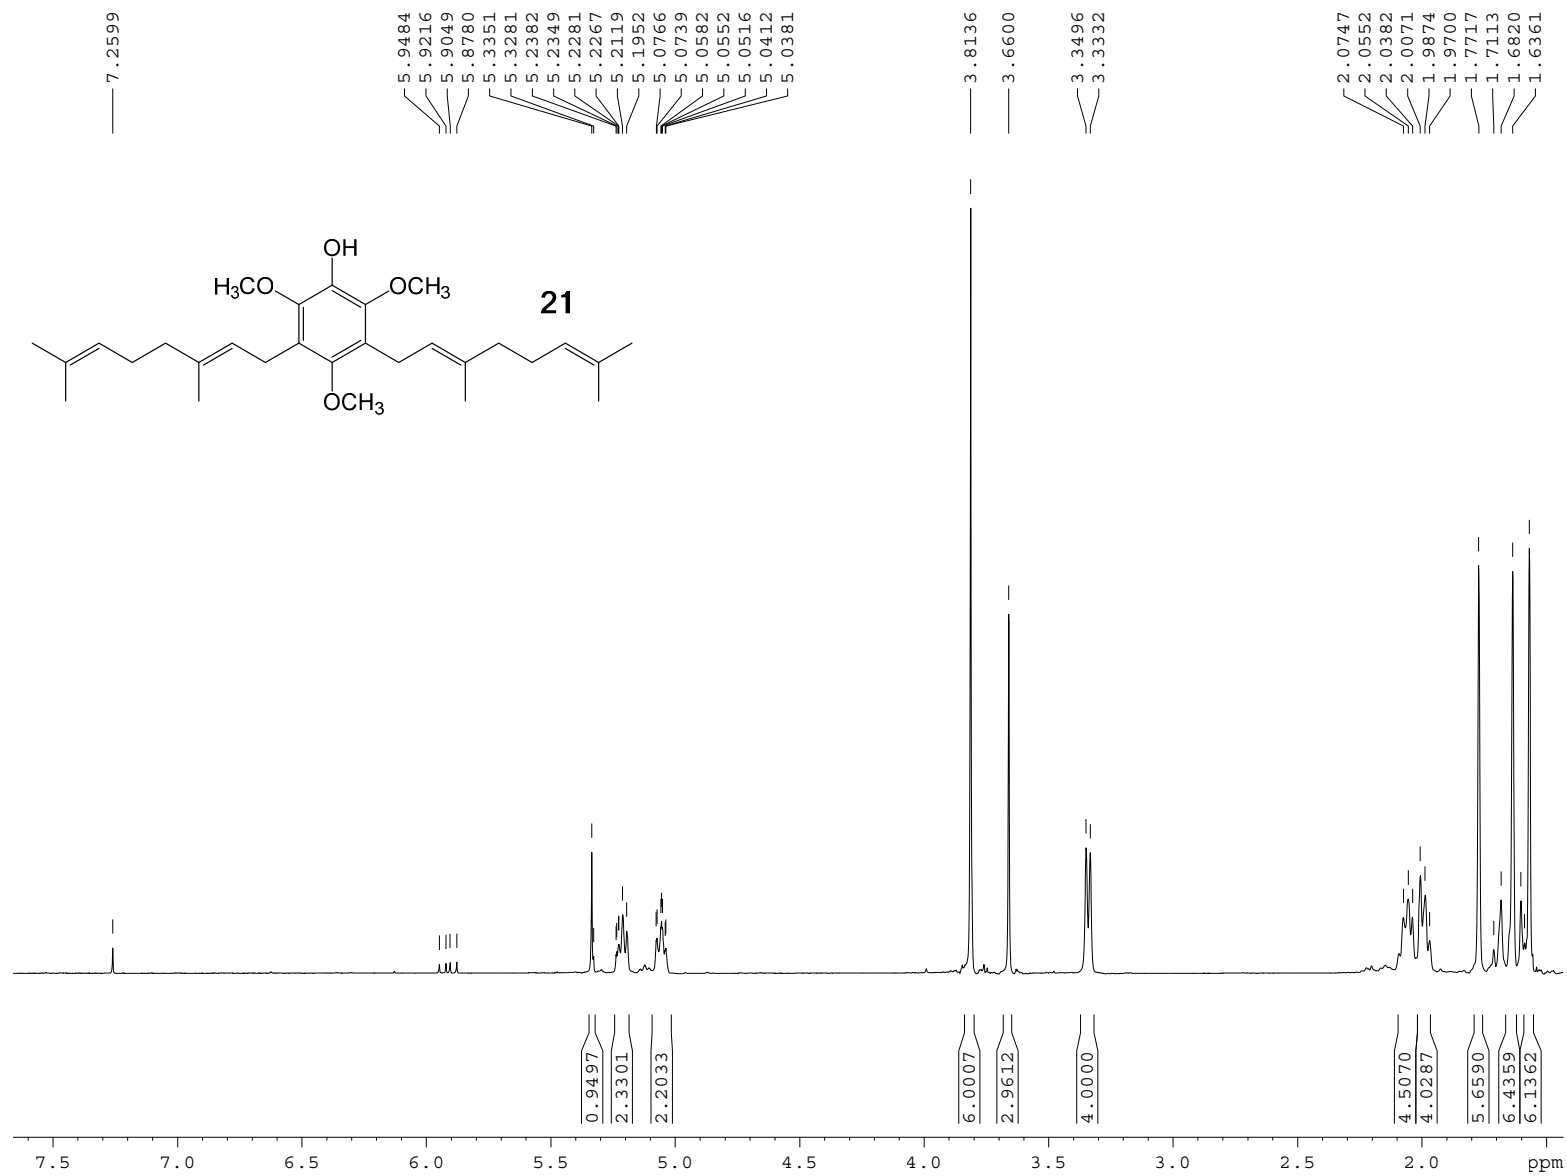

Figure S1. Cont.

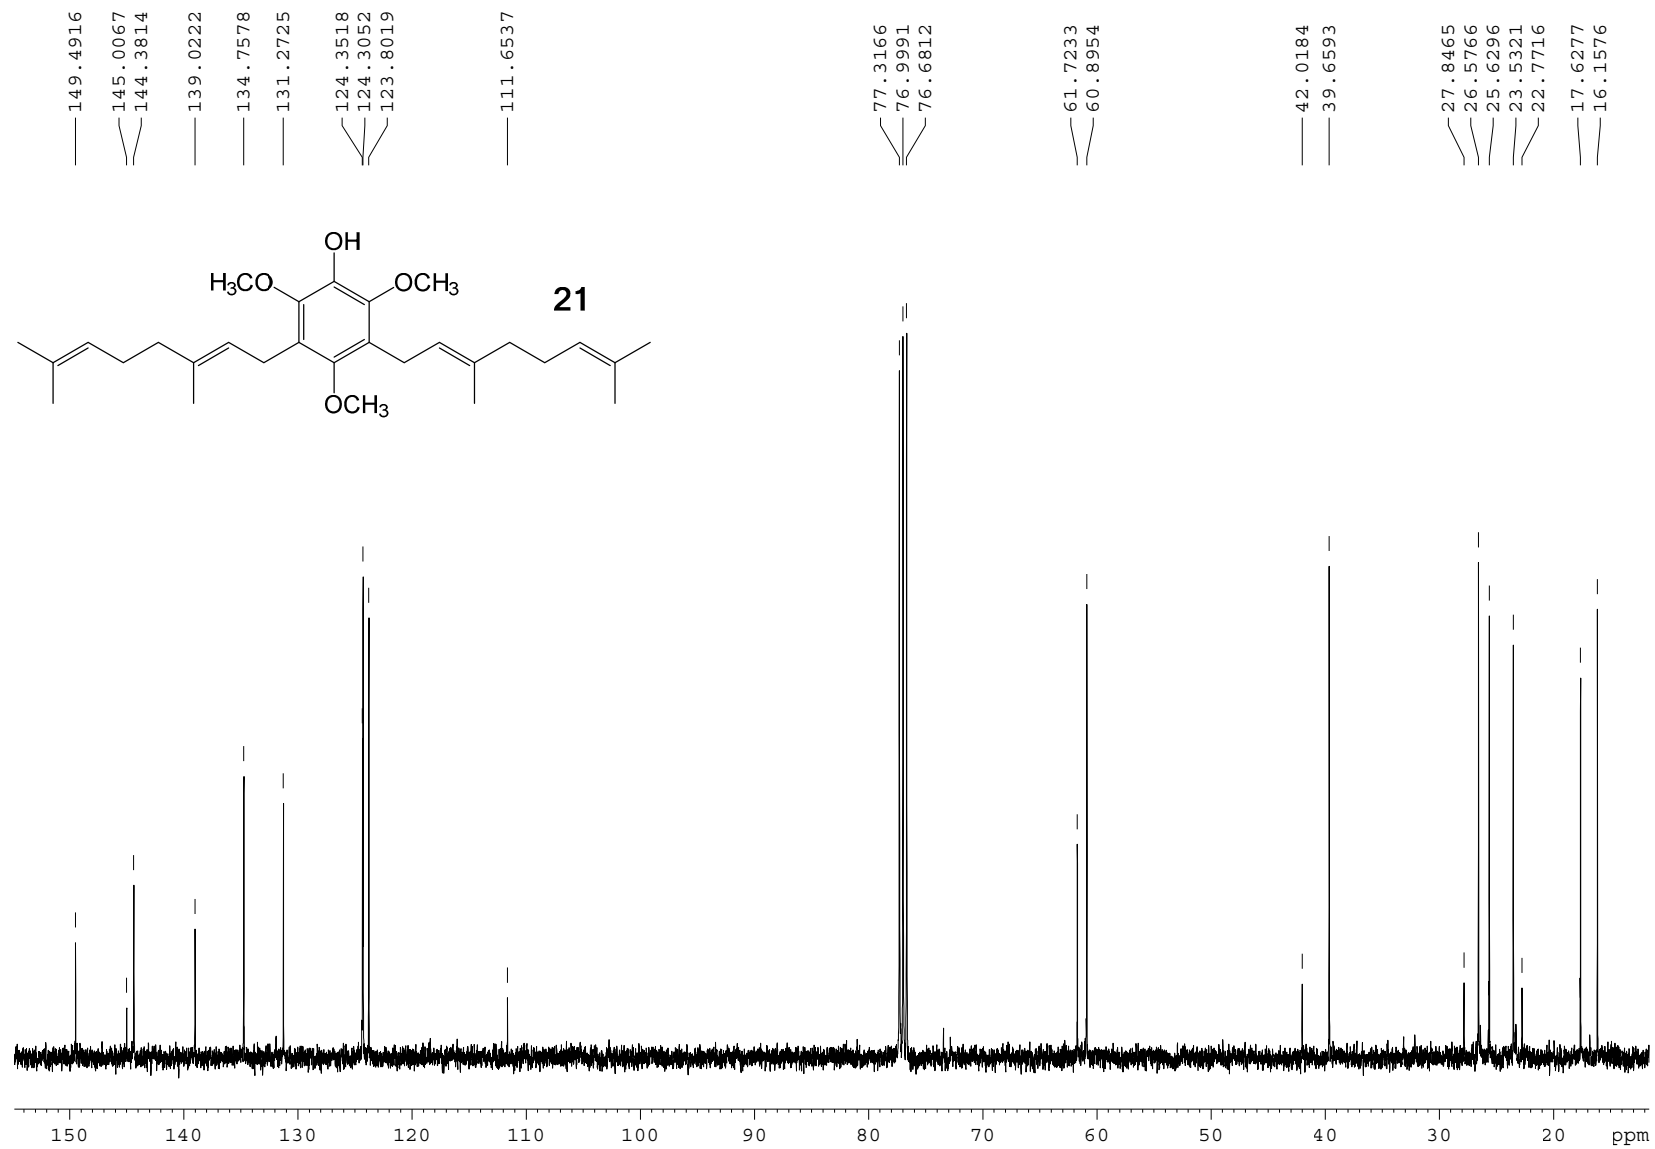Figure S1. *Cont.*

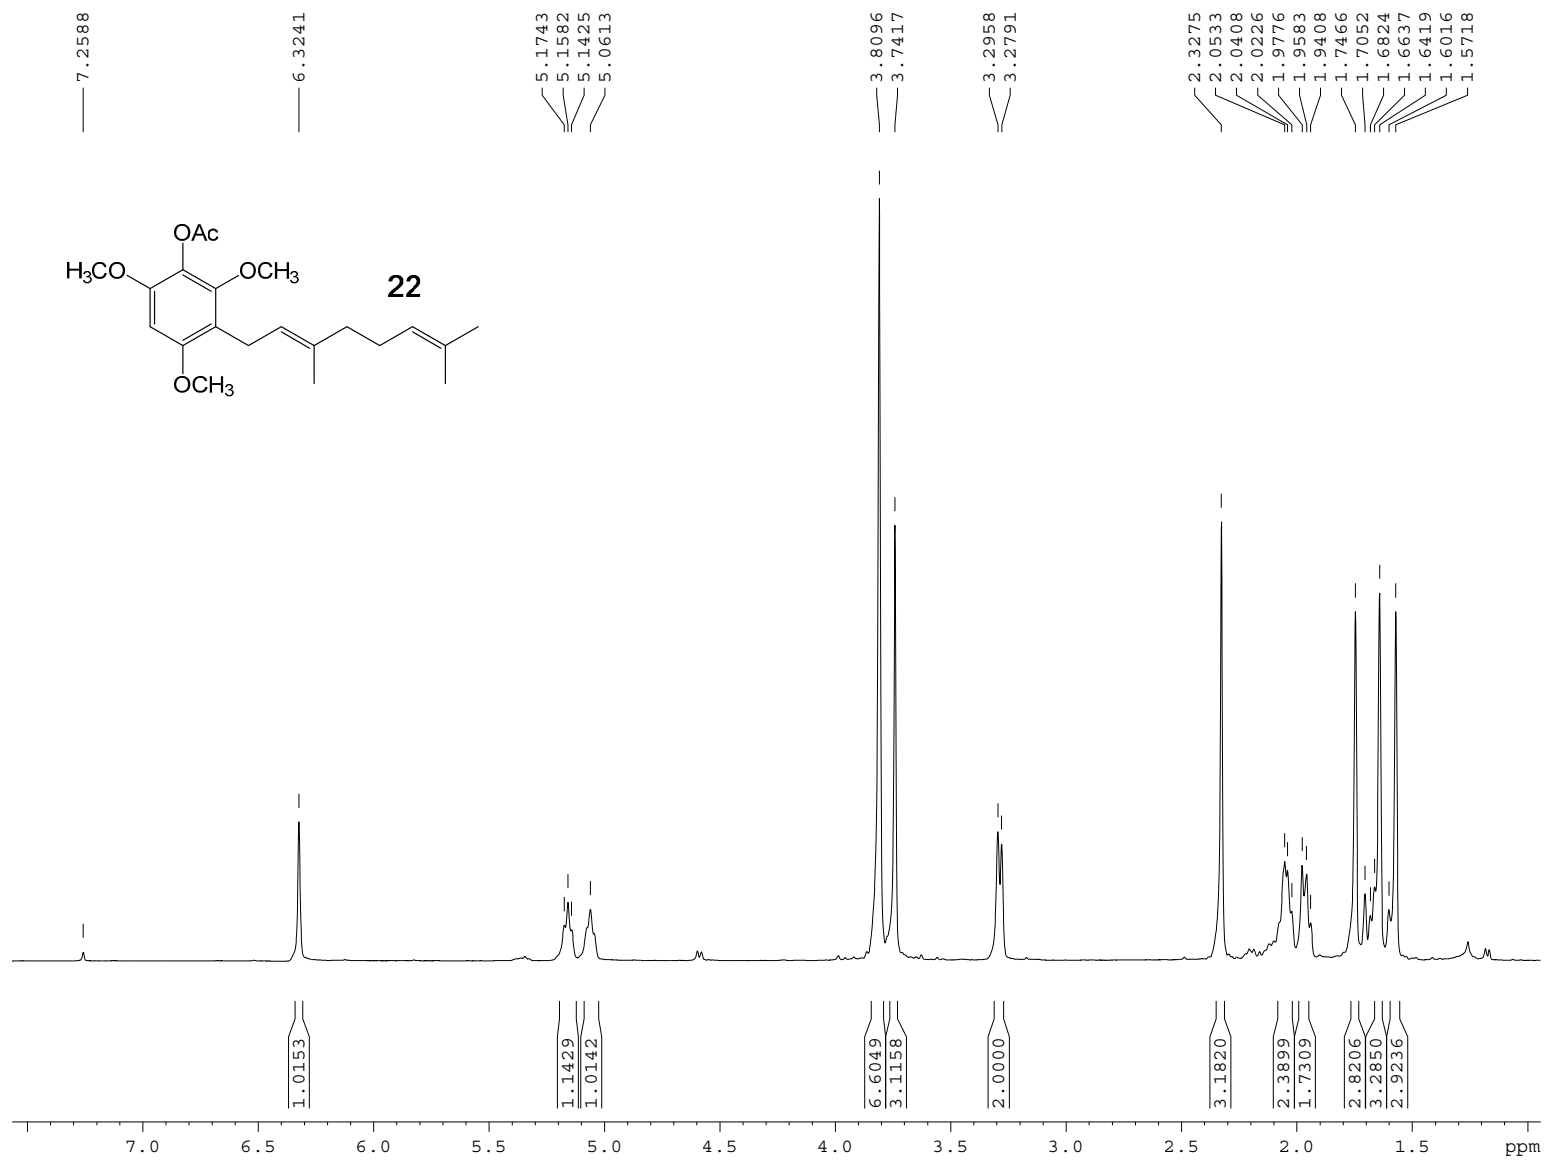

Figure S1. Cont.

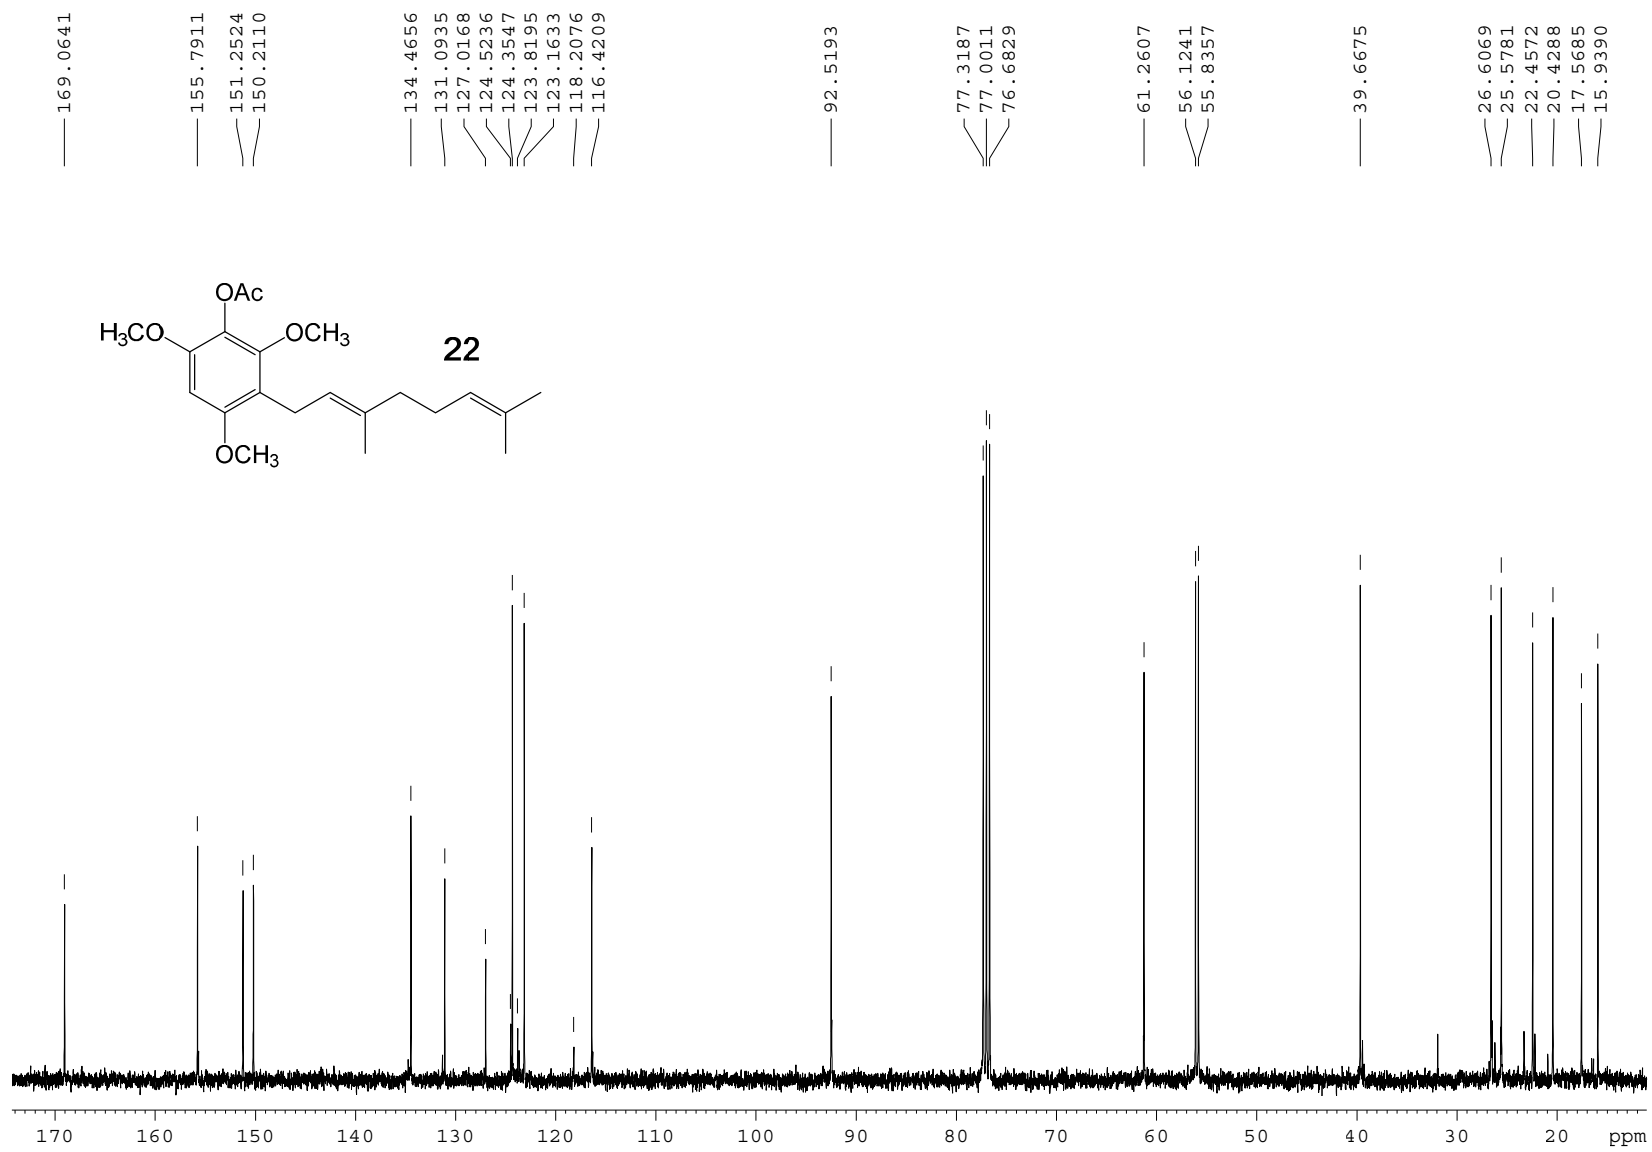

Figure S1. Cont.



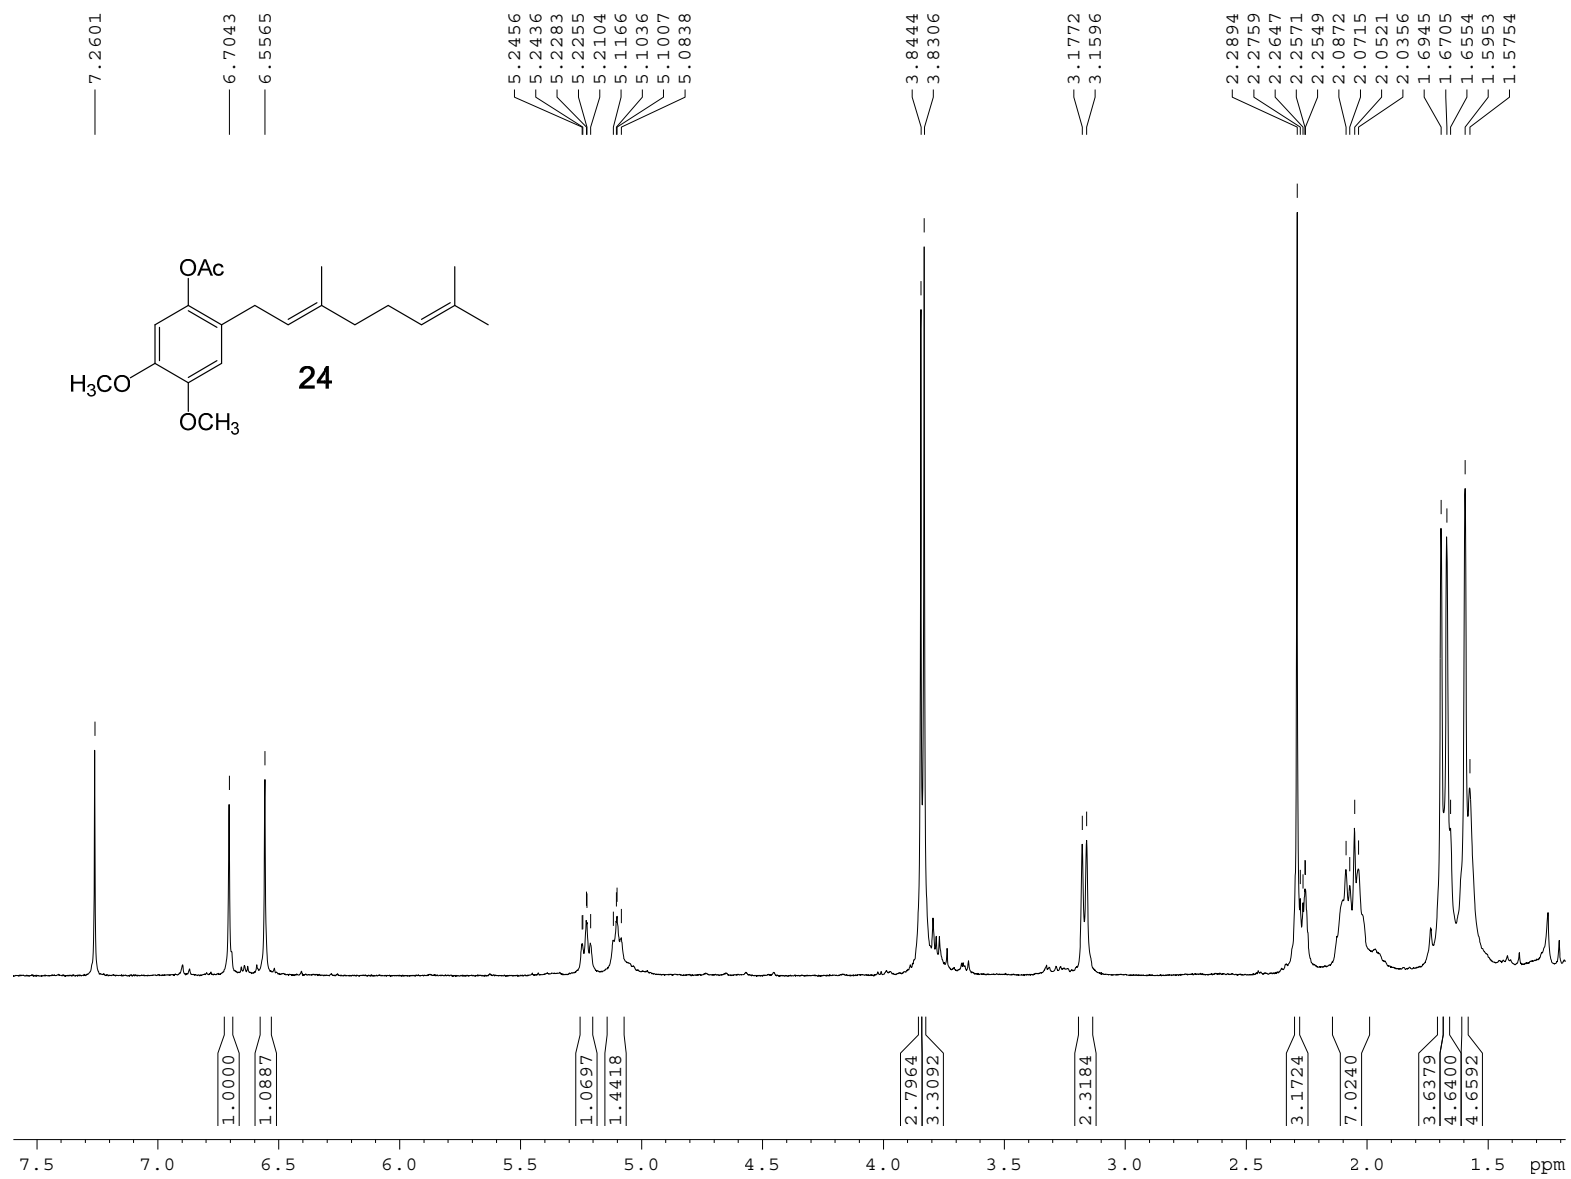

Figure S1. Cont.

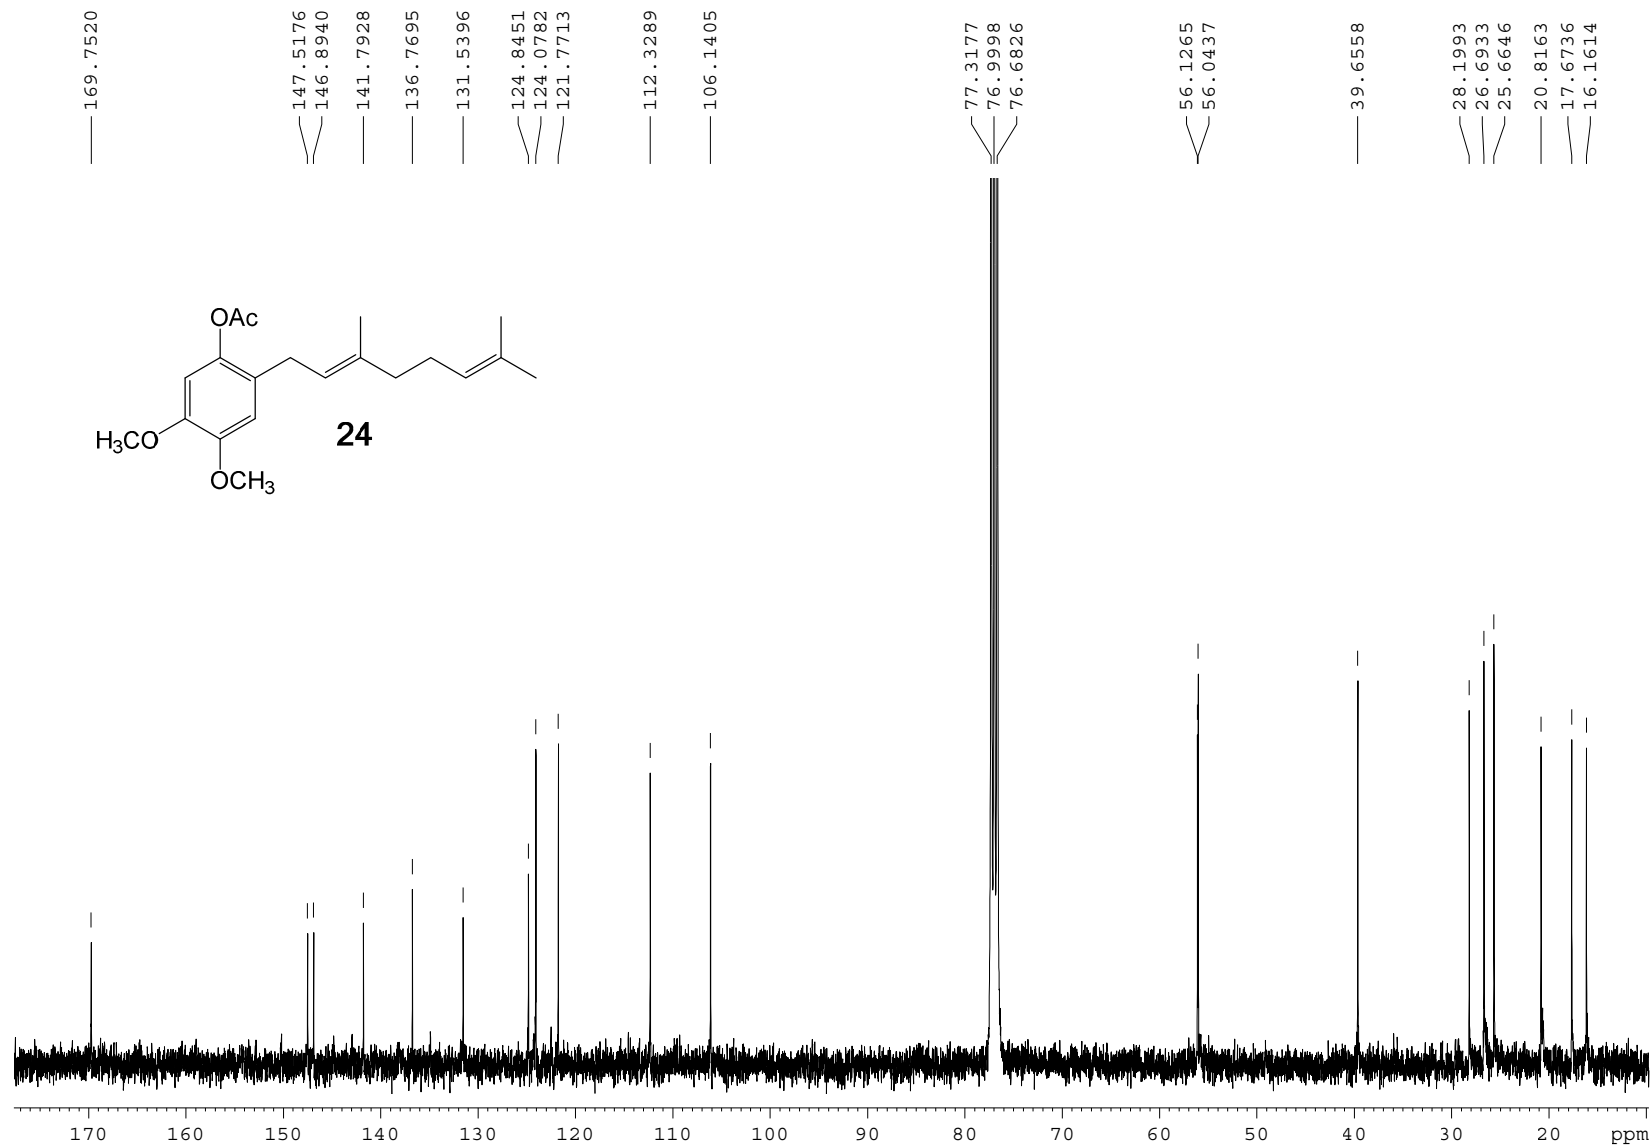

Figure S1. NMR spectra of compounds 12, 13, 15, 18, 19, 20, 21, 22 and 24.
